# Supplementary material
Source: MDPI journal article supplement (https://www.mdpi.com/2624-5175/4/1/6)
Supplement: s1 [file s1]

## Supplementary files

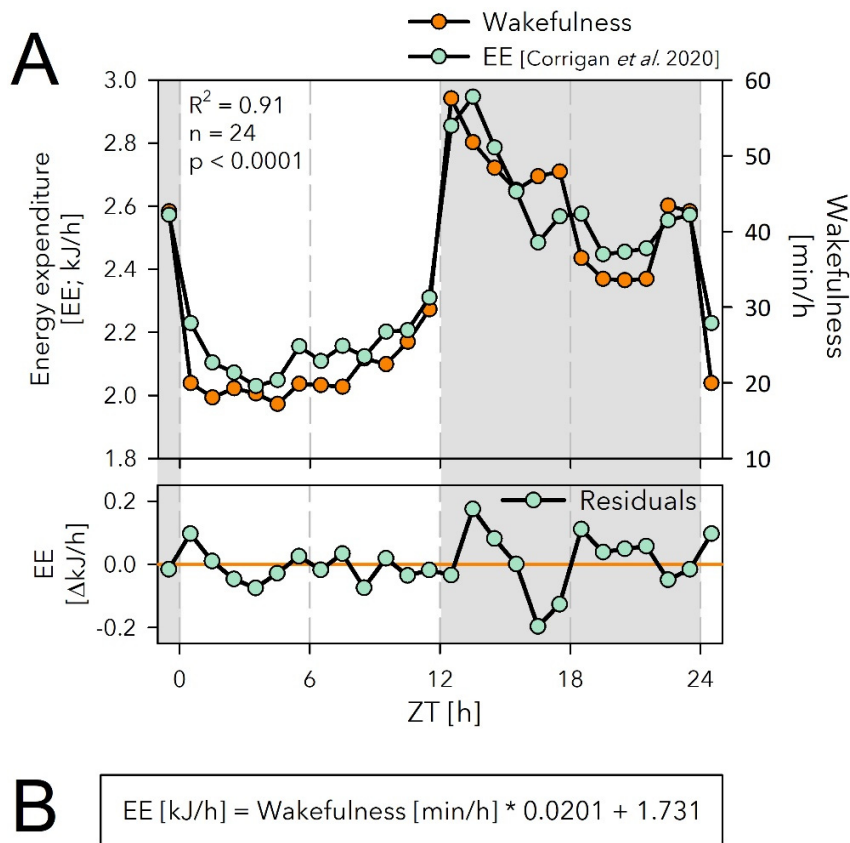

**Figure S1: Relationship between energy expenditure (EE) and time-spent-awake under baseline conditions.** (A) The time course of hourly values of EE (mint symbols; mean over 3 days;  $n=8$ , body weight: 28.4g, C57BL/6J males; data taken from Corrigan *et al.* 2020) closely follows that of time-spent-awake (orange symbols, same as in Fig. 3A). The two variables strongly correlated (linear regression) with only small residuals that did not systematically vary with time-of-day (lower graph). (B) Equation of the linear regression, which predicts that a mouse will spent 1.73 or 2.9kJ, if asleep or awake for 60min, respectively, in a given hour.

| <b>Gene</b>    |                | <b>Sequence (5' --&gt; 3')</b>            | <b>Accession</b> |
|----------------|----------------|-------------------------------------------|------------------|
| <i>Eef1a1</i>  | <i>Forward</i> | CCT GGC AAG CCC ATG TGT                   | NM_010106.2      |
|                | <i>Reverse</i> | TCA TGT CAC GAA CAG CAA AGC               |                  |
|                | <i>Probe</i>   | TGA GAG CTT CTC TGA CTA CCC TCC ACT TGG T |                  |
| <i>Gapdh</i>   | <i>Forward</i> | TCC ATG ACA ACT TTG GCA TTG               | NM_001001303.1   |
|                | <i>Reverse</i> | CAG TCT TCT GGG TGG CAG TGA               |                  |
|                | <i>Probe</i>   | AAG GGC TCA TGA CCA CAG TCC ATG C         |                  |
| <i>Rps9</i>    | <i>Forward</i> | GAC CAG GAG CTA AAG TTG ATT GGA           | NM_029767.2      |
|                | <i>Reverse</i> | TCT TGG CCA GGG TAA ACT TGA               |                  |
|                | <i>Probe</i>   | AAA CCT CAC GTT TGT TCC GGA GTC CAT ACT   |                  |
| <i>Per1</i>    | <i>Forward</i> | ACC AGC GTG TCA TGA TGA CAT AC            | NM_011065.4      |
|                | <i>Reverse</i> | CTC TCC CGG TCT TGC CTT CAG               |                  |
|                | <i>Probe</i>   | CCG TCC AGG GAT GCA GCC TCT               |                  |
| <i>Per2</i>    | <i>Forward</i> | ATG CTC GCC ATC CAC AAG A                 | NM_011066.3      |
|                | <i>Reverse</i> | GCG GAA TCG AAT GGG AGA AAT               |                  |
|                | <i>Probe</i>   | ATC CTA CAG GCC GGT GGA CAG CC            |                  |
| <i>Cry1</i>    | <i>Forward</i> | GTT GGC CGG CTC TTC CA                    | NM_007771.3      |
|                | <i>Reverse</i> | CAA GAT CCT CAA GAC ACT GAA GCA           |                  |
|                | <i>Probe</i>   | CGT GGG CAT CAA CAG GTG GCG               |                  |
| <i>Dbp</i>     | <i>Forward</i> | CGT GGA GGT GCT TAA TGA CCT TT            | NM_016974.3      |
|                | <i>Reverse</i> | CAT GGC CTG GAA TGC TTG A                 |                  |
|                | <i>Probe</i>   | AAC CTG ATC CCG CTG ATC TCG CC            |                  |
| <i>Homer1a</i> | <i>Forward</i> | GCA TTG CCA TTT CCA CAT AGG               | NM_011982.2      |
|                | <i>Reverse</i> | ATG AAC TTC CAT ATT TAT CCA CCT TAC TT    |                  |
|                | <i>Probe</i>   | ACA CAT TCA ATT CAG CAA TCA TGA           |                  |

**Table S1: Primers and probes used for quantitative PCR**
